# Supplementary material
Source: publisher site journal article supplement (https://cdn.jamanetwork.com/ama/content_public/journal/jama/938785/joi210099supp1_prod_1633976015.06486.pdf)
Supplement: Supplementary file 1 [file joi210099supp1_prod_1633976015.06486.pdf]

## Supplemental Online Content

Klein NP, Lewis N, Goddard K, et al. Surveillance for adverse events after COVID-19 mRNA vaccination. *JAMA*. Published online September 3, 2021.  
doi:10.1001/jama.2021.15072

**eTable 1.** Diagnostic codes used to identify outcomes and adjust onset date.

**eTable 2.** Exclusionary diagnostic codes.

**eFigure 1.** Illustration of primary analyses using vaccinated concurrent comparators and supplemental analyses using unvaccinated concurrent comparators.

**eTable 3.** Summary of Signals during 21-day Risk Interval, from separate Dose 1, Dose 2 and Vaccine Product Analyses.

**eFigure 2.** Clustering of medical record confirmed myocarditis/pericarditis cases by days since most recent dose of any mRNA vaccine among individuals 12-39 years of age.

**eTable 4.** Medical record review of 34 confirmed myocarditis/pericarditis cases 0-21 days after mRNA vaccines within individuals aged 12-39 years, December 14, 2021 - June 19, 2021.

**eTable 5.** Confirmed myocarditis/pericarditis following mRNA vaccines compared with vaccinated comparators among individuals aged 12 – 39 years by vaccine type and dose, December 14, 2020-June 19, 2021.

**eTable 6.** Unvaccinated concurrent comparator analyses, December 14, 2020-June 26, 2021.

This supplemental material has been provided by the authors to give readers additional information about their work.

**eTable 1. Diagnostic codes used to identify outcomes and adjust onset date.**

| <b>Outcomes for Comparative Analyses</b>                                                                        | <b>ICD-10 code(s)</b>                                                                             | <b>Planned Medical Record Review</b> | <b>Codes for Lookback to Adjust Onset Date (All Settings)</b>                                                        |
|-----------------------------------------------------------------------------------------------------------------|---------------------------------------------------------------------------------------------------|--------------------------------------|----------------------------------------------------------------------------------------------------------------------|
| Acute disseminated encephalomyelitis                                                                            | G04.00, G04.02                                                                                    | Y                                    | n/a                                                                                                                  |
| Acute myocardial infarction                                                                                     | I21.*                                                                                             | N                                    | n/a                                                                                                                  |
| Appendicitis                                                                                                    | K35.*, K36, K37, K38.8                                                                            | N                                    | n/a                                                                                                                  |
| Bell's palsy                                                                                                    | G51.0                                                                                             | N                                    | n/a                                                                                                                  |
| Cerebral venous sinus thrombosis                                                                                | G08, I63.6, I67.6                                                                                 | Y                                    | n/a                                                                                                                  |
| Convulsions / seizures                                                                                          | R56.0*, R56.9                                                                                     | N                                    | n/a                                                                                                                  |
| Disseminated intravascular coagulation                                                                          | D65                                                                                               | N                                    | n/a                                                                                                                  |
| Encephalitis / myelitis / encephalomyelitis / (not acute disseminated encephalomyelitis or transverse myelitis) | G04.30, G04.32, G04.39, G04.8*, G04.9*, G05.*, G37.4                                              | N                                    | n/a                                                                                                                  |
| Guillain-Barré syndrome                                                                                         | G61.0                                                                                             | Y                                    | n/a                                                                                                                  |
| Immune thrombocytopenia                                                                                         | D69.3                                                                                             | N                                    | <u>If in 1 year prior to case:</u> low platelet count <100 K/uL                                                      |
| Kawasaki disease                                                                                                | M30.3                                                                                             | N                                    | n/a                                                                                                                  |
| Myocarditis / pericarditis                                                                                      | B33.22, B33.23, I30.*, I40.*                                                                      | Y (subgroup only)                    | n/a                                                                                                                  |
| Pulmonary embolism                                                                                              | I26.*                                                                                             | N                                    | n/a                                                                                                                  |
| Stroke, hemorrhagic                                                                                             | I60.*, I61.*, I62.*                                                                               | N                                    | <u>If in 1 day prior to case:</u> G81.9*, H53.13*, H53.9, I63.9, R29.810, R40.4, R41.82, R42.*, R47.*, R51.*, R53.1  |
| Stroke, ischemic                                                                                                | G45.8, G45.9, I63.*                                                                               | N                                    | <u>If in 1 day prior to case:</u> G81.9*, H53.13*, H53.9, R29.810, R40.4, R41.82, R42.*, R47.*, R51.*, R53.1, Z92.82 |
| Thrombosis with thrombocytopenia <sup>1</sup>                                                                   | G08, I63.6, I67.6, I74.0*, I74.1*, I74.3, I74.5, I74.8, I74.9, I81, I82.0, I82.890, K55.0*, N28.0 | Y                                    | n/a                                                                                                                  |
| Thrombotic thrombocytopenic purpura                                                                             | M31.1                                                                                             | N                                    | n/a                                                                                                                  |
| Transverse myelitis                                                                                             | G37.3                                                                                             | Y                                    | n/a                                                                                                                  |
| Venous thromboembolism                                                                                          | I26.*, I82.210, I82.220, I82.290, I82.3, I82.4*, I82.60*, I82.62*, I82.A1*                        | N                                    | <u>If in 14 days prior to case:</u> M79.65*, M79.66*, R22.4*                                                         |

| <b>Outcomes for Comparative Analyses</b>                                                       | <b>ICD-10 code(s)</b>                   | <b>Planned Medical Record Review</b> | <b>Codes for Lookback to Adjust Onset Date (All Settings)</b> |
|------------------------------------------------------------------------------------------------|-----------------------------------------|--------------------------------------|---------------------------------------------------------------|
|                                                                                                | I82.B1*,<br>I82.C1*,<br>I82.890, I82.90 |                                      |                                                               |
| <b>Outcomes for descriptive monitoring only</b>                                                | <b>ICD-10 code(s)</b>                   | <b>Planned Medical Record Review</b> | <b>Monitoring Period</b>                                      |
| Acute respiratory distress syndrome                                                            | J80                                     | N                                    | 0-84 days                                                     |
| Anaphylaxis                                                                                    | T78.2*, T80.52*,<br>T88.6*              | Y                                    | 0-1 days                                                      |
| Multisystem inflammatory syndrome in children /<br>Multisystem inflammatory syndrome in adults | M35.8 + U07.1,<br>or M35.81             | N                                    | 0-84 days                                                     |
| Narcolepsy / cataplexy                                                                         | G47.41*                                 | N                                    | 0-84 days                                                     |

\*Cases required to have one of the listed ICD-10 codes and a platelet count of <150,000 for inclusion.

**eTable 2. Exclusionary diagnostic codes.**

| <b>Outcome for comparative analyses</b> | <b>Exclusions for Prevalence - with lookback period for exclusion</b>                                                      | <b>Exclusions – other known causes (in all settings) - with lookback period for exclusion (not including same day unless noted in column to the right)</b>                                                                                                                                                                                                                                                                                                                                                                                                                                                                                                                               | <b>Exclusions – same day, other known causes (in all settings)</b>                                                     |
|-----------------------------------------|----------------------------------------------------------------------------------------------------------------------------|------------------------------------------------------------------------------------------------------------------------------------------------------------------------------------------------------------------------------------------------------------------------------------------------------------------------------------------------------------------------------------------------------------------------------------------------------------------------------------------------------------------------------------------------------------------------------------------------------------------------------------------------------------------------------------------|------------------------------------------------------------------------------------------------------------------------|
| Acute disseminated encephalomyelitis    | n/a                                                                                                                        | n/a                                                                                                                                                                                                                                                                                                                                                                                                                                                                                                                                                                                                                                                                                      | n/a                                                                                                                    |
| Acute myocardial infarction             | <u>If occurs EVER prior to case:</u> I22.*, I23.*, I25.2                                                                   | <u>If in last 30 days prior to case:</u> First COVID-19 diagnosis code or COVID-19 positive lab test<br><u>If in last 7 days prior to case:</u> Physical trauma code <sup>2</sup><br><u>If EVER prior to case:</u> I25.1                                                                                                                                                                                                                                                                                                                                                                                                                                                                 | Same exclusions as column to the left                                                                                  |
| Appendicitis                            | n/a                                                                                                                        | n/a                                                                                                                                                                                                                                                                                                                                                                                                                                                                                                                                                                                                                                                                                      | n/a                                                                                                                    |
| Bell's palsy                            | n/a                                                                                                                        | <u>If in last 30 days prior to case:</u> First COVID-19 diagnosis code or COVID-19 positive lab test<br><u>If in last 14 days prior to case:</u> A69.2*, A92.5, B00.*, B02.*<br><u>If EVER prior to case:</u> D86.*                                                                                                                                                                                                                                                                                                                                                                                                                                                                      | Same exclusions as column to the left                                                                                  |
| Cerebral venous sinus thrombosis        | n/a                                                                                                                        | <u>If in last 30 days prior to case:</u> First COVID-19 diagnosis code or COVID-19 positive lab test<br><u>Exclude if incident case occurs any time during pregnancy or within 6 weeks after pregnancy ends:</u><br><u>O22.5*, O87.3</u>                                                                                                                                                                                                                                                                                                                                                                                                                                                 | <u>If same day as incident case:</u><br><u>S02.*, S06.*, S09.*, S15.*</u> ,<br><u>Physical trauma code<sup>2</sup></u> |
| Convulsions / seizures                  | <u>If occurs EVER prior to case:</u> F44.5, G40.A*, G40.B*, G40.0*, G40.1*, G40.2*, G40.3*, G40.4*, G40.5*, G40.8*, G40.9* | <u>If in last 30 days prior to case:</u> First COVID-19 diagnosis code or COVID-19 positive lab test<br><u>If in last 1 year prior to case:</u> G03.1<br>S06.3*, S06.9*, Z86.61<br><u>If EVER prior to case:</u> I69.*, Z86.73,<br><u>If in last 3 days prior to case:</u><br>I60.*, I61.*, I62.*, I63.*<br><u>If in last 7 days prior to case:</u><br>A17.0, A17.82, A27.81, A32.1*, A39.0, A39.81, A41.9, A69.21, A85.*, A86, A87.*<br>A88.0, A88.8, A89, A92.31, A92.5, B00.*, B01.0, B01.11, B02.*, B05.*, B06.*, B10.81, B26.*, B45.1, B58.2, B96.0, G00.*, G01, G02, G03.0, G03.8, G04.3*, G04.81, G04.90, G05.3, G92, G93.41, G95.1*, G95.89, J09.*, J10.*, J11.*, R65.20, R65.21 | <u>If same day as case:</u><br>S06.0X9A, S06.3*, S06.9*                                                                |
| Disseminated intravascular coagulation  | n/a                                                                                                                        | <u>If in last 42 days prior to case:</u> First COVID-19 diagnosis code or COVID-19 positive lab test<br><u>If in last 14 days prior to case:</u><br>Physical trauma code <sup>2</sup> C92.4*, K85.*, O45.02*, O46.02*, O67.0, S06.*, T30-T32                                                                                                                                                                                                                                                                                                                                                                                                                                             | Same exclusions as column to the left                                                                                  |

| <b>Outcome for comparative analyses</b>                                                                                        | <b>Exclusions for Prevalence - with lookback period for exclusion</b> | <b>Exclusions – other known causes (in all settings) - with lookback period for exclusion (not including same day unless noted in column to the right)</b>                                                                                                                                                                                                                                                                                     | <b>Exclusions – same day, other known causes (in all settings)</b>             |
|--------------------------------------------------------------------------------------------------------------------------------|-----------------------------------------------------------------------|------------------------------------------------------------------------------------------------------------------------------------------------------------------------------------------------------------------------------------------------------------------------------------------------------------------------------------------------------------------------------------------------------------------------------------------------|--------------------------------------------------------------------------------|
| Encephalitis / myelitis / encephalomyelitis / encephalopathy (not acute disseminated encephalomyelitis or transverse myelitis) | <u>If occurs EVER prior to case:</u> G03.1, Z86.61                    | <u>If in last 30 days prior to case:</u> First COVID-19 diagnosis code or COVID-19 positive lab test<br><u>If in last 7 days prior to case:</u><br>A17.0, A17.82, A27.81, A32.1*, A39.0, A39.81, A41.9, A69.21, A85.*, A86, A87.*, A88.0, A88.8, A89, A92.31, A92.5, B00.*, B01.0, B01.1*, B02.*, B05.*, B06.*, B10.81, B26.*, B45.1, B58.2, B96.0, G00.*, G01, G02, G03.0, G03.8, G04.31, G95.1*, G95.89, J09.*, J10.*, J11.*, R65.20, R65.21 | Same exclusions as column to the left                                          |
| Guillain-Barré syndrome                                                                                                        | <u>If occurs EVER prior to case:</u> G65.0                            | n/a                                                                                                                                                                                                                                                                                                                                                                                                                                            | n/a                                                                            |
| Immune thrombocytopenia                                                                                                        | n/a                                                                   | <u>If in last 30 days prior to case:</u> First COVID-19 diagnosis code or COVID-19 positive lab test<br><u>If EVER prior to case:</u><br>B20, C00-C96, D18.0*, D59.0-D59.2, D59.3, D61.*, D65, D69.0, D80-D89, K70-K77, M32.*, Z51.11                                                                                                                                                                                                          | n/a                                                                            |
| Kawasaki disease                                                                                                               | n/a                                                                   | n/a                                                                                                                                                                                                                                                                                                                                                                                                                                            | n/a                                                                            |
| Myocarditis / pericarditis                                                                                                     | n/a                                                                   | <u>If in last 30 days prior to case:</u> First COVID-19 diagnosis code or COVID-19 positive lab test                                                                                                                                                                                                                                                                                                                                           | Same exclusions as column to the left                                          |
| Pulmonary embolism                                                                                                             | <u>If occurs EVER prior to case:</u> I27.82, Z86.71*                  | <u>If in last 30 days prior to case:</u> First COVID-19 diagnosis code or COVID-19 positive lab test<br><u>If in last 14 days prior to case:</u> Physical trauma code <sup>2</sup> , O88.0*, O88.1*, T79.1*                                                                                                                                                                                                                                    | Same exclusions as column to the left minus COVID-19                           |
| Stroke, hemorrhagic                                                                                                            | <u>If occurs EVER prior to case:</u> I69.*, Z86.73                    | <u>If in last 30 days prior to case:</u> First COVID-19 diagnosis code or COVID-19 positive lab test<br><u>If in last 1 day prior to case:</u> S06.*                                                                                                                                                                                                                                                                                           | <u>If same day as case:</u><br>S06.*, Physical trauma code <sup>2</sup>        |
| Stroke, ischemic                                                                                                               | <u>If occurs EVER prior to case:</u> I69.*, Z86.73                    | <u>If in last 30 days prior to case:</u> First COVID-19 diagnosis code or COVID-19 positive lab test<br><u>If in last 1 day prior to case:</u> S15.*, I74.*<br><u>If in last 28 days prior to case:</u><br>I21.*<br><u>If EVER prior to case:</u><br>I48.*, D57.*, D68.5*                                                                                                                                                                      | <u>If same day as case:</u><br>S15.*, I74.*, Physical trauma code <sup>2</sup> |
| Thrombosis with thrombocytopenia syndrome                                                                                      | n/a                                                                   | <u>If in last 30 days prior to case:</u> First COVID-19 diagnosis code or COVID-19 positive lab test                                                                                                                                                                                                                                                                                                                                           | n/a                                                                            |
| Thrombotic thrombocytopenia purpura                                                                                            | n/a                                                                   | <u>If in last 30 days prior to case:</u> First COVID-19 diagnosis code or COVID-19 positive lab test<br><u>If in last 1 year prior to case:</u> B20, C00-C96, Z51.11, Z94.84                                                                                                                                                                                                                                                                   | n/a                                                                            |

| <b>Outcome for comparative analyses</b>                                                     | <b>Exclusions for Prevalence - with lookback period for exclusion</b>                                                                      | <b>Exclusions – other known causes (in all settings) - with lookback period for exclusion (not including same day unless noted in column to the right)</b>                                                                                                                                                                                                              | <b>Exclusions – same day, other known causes (in all settings)</b> |
|---------------------------------------------------------------------------------------------|--------------------------------------------------------------------------------------------------------------------------------------------|-------------------------------------------------------------------------------------------------------------------------------------------------------------------------------------------------------------------------------------------------------------------------------------------------------------------------------------------------------------------------|--------------------------------------------------------------------|
|                                                                                             |                                                                                                                                            | <u>If anytime during pregnancy or within 6 weeks after pregnancy ends: Search pregnancy database OR O99.1*</u>                                                                                                                                                                                                                                                          |                                                                    |
| Transverse myelitis                                                                         | n/a                                                                                                                                        | n/a                                                                                                                                                                                                                                                                                                                                                                     | n/a                                                                |
| Venous thromboembolism                                                                      | <u>If occurs EVER prior to case:</u> I27.82, I82.211, I82.221, I82.291, I82.5*, I82.7*, I82.A2, I82.B2*, I82.C2*, I82.891, I82.91, Z86.71* | <u>If in last 60 days prior to case:</u> Physical trauma code <sup>2</sup> , C00-C96, M67.9*, M80.* , M84.3*, M99.* , O08.2, O22.3*, O22.5*, O87.1, O88.2*, S00-T88, Z08, Z09, Z51.5, Z51.89, Z30.011, Z79.890<br><u>If in last 14 days prior to case:</u> Pneumonia code <sup>3</sup> , I50.* , O88.0*, O88.1*, T79.1*<br><u>If EVER prior to case:</u> D68.5*, D68.6* | Same exclusions as column to the left minus COVID-19               |
| <b>Outcomes for descriptive monitoring only</b>                                             | <b>Exclusions for Prevalence - with lookback period for exclusion</b>                                                                      | <b>Exclusions – other known causes (in all settings) - with lookback period for exclusion (not including same day unless noted in column to the right)</b>                                                                                                                                                                                                              | <b>Exclusions – same day, other known causes (in all settings)</b> |
| Acute respiratory distress syndrome                                                         | n/a                                                                                                                                        | <u>If in last 42 days prior to case:</u> First COVID-19 diagnosis code or COVID-19 positive lab test<br><u>If in last 14 days prior to case:</u> Sepsis code <sup>1</sup><br>Physical trauma code <sup>2</sup><br>J09.* , J10.* , J11.* , J68.* , J69.0, J70.5, J70.8, J70.9, K85.* , T75.1*                                                                            | Same exclusions as column to the left                              |
| Anaphylaxis                                                                                 | n/a                                                                                                                                        | n/a                                                                                                                                                                                                                                                                                                                                                                     | n/a                                                                |
| Multisystem inflammatory syndrome in children / Multisystem inflammatory syndrome in adults | n/a                                                                                                                                        | n/a                                                                                                                                                                                                                                                                                                                                                                     | n/a                                                                |
| Narcolepsy and cataplexy                                                                    | n/a                                                                                                                                        | n/a                                                                                                                                                                                                                                                                                                                                                                     | n/a                                                                |

<sup>1</sup> Sepsis codes: A02.1, A20.7, A22.7, A26.7, A32.7, A39.1, A39.2, A39.3, A39.4, A39.89, A39.9, A40.\* , A41.\* , A42.7, A54.86, B00.7, B37.7, O85, O86.04, R65.2\*, R78.81, T81.44\*

<sup>2</sup> Physical trauma codes: V00-Y99

<sup>3</sup> Pneumonia codes: A22.1, B25.0, A37.01, A37.11, A37.81, A37.91, A48.1, B44.0, B77.81, J12.\* , J13, J14, J15.\* , J16.\* , J17, J18.\*

**eFigure 1. Illustration of primary analyses using vaccinated concurrent comparators and supplemental analyses using unvaccinated concurrent comparators.**

### VSD COVID-19 RCA – Vaccinated Comparison

- To have an informative vaccinated case in their risk interval, there must be a vaccinated person in their comparison interval on that same calendar day in the same age, sex, race/ethnicity, site stratum
- There does not have to be a case, just a person who has comparison time from the same stratum

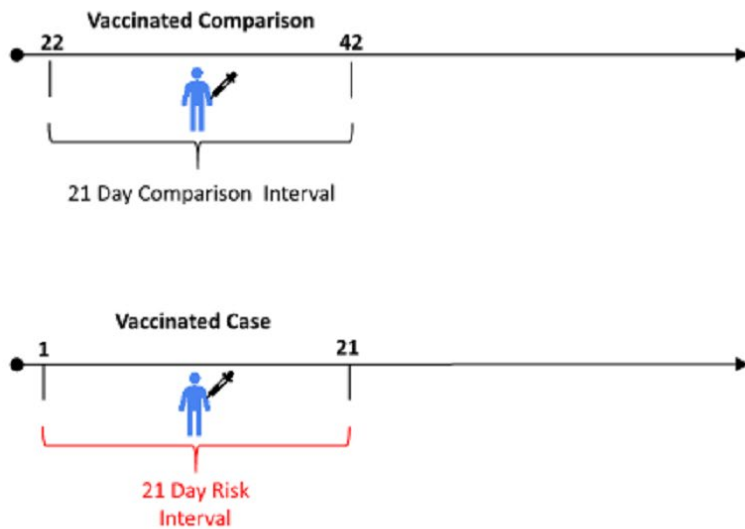

### VSD COVID-19 RCA – Unvaccinated Comparison

- To have an informative vaccinated case in their risk interval, there must be an unvaccinated person on that same calendar day in the same age, sex, race/ethnicity, site stratum
- There does not have to be a case, just a person who from the same stratum

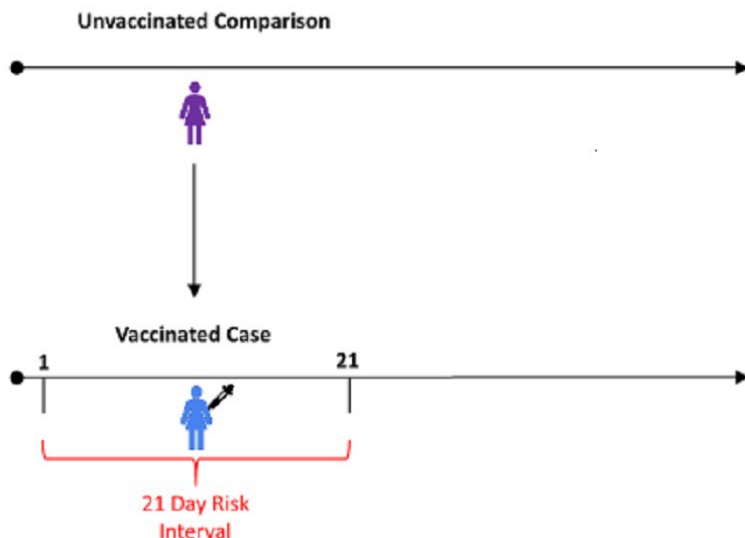

Top graph illustrates the primary analyses of the 1-21-day risk interval using vaccinated concurrent comparators. Each week, all the data since the surveillance period began Dec 14, 2020 were analyzed, adjusted for age, sex, race/ethnicity, site and calendar day. Bottom graph illustrates the supplemental analyses using unvaccinated concurrent comparators. Supplemental analyses similarly adjusted for age, sex, race/ethnicity, site and calendar day.

**eTable 3. Summary of Signals\* during 21-day Risk Interval, from separate Dose 1, Dose 2 and Vaccine Product Analyses.**

| Outcome                                     | mRNA-1273     |               |                   | BNT162b2      |               |                   | Both mRNA Vaccines |               |                   |
|---------------------------------------------|---------------|---------------|-------------------|---------------|---------------|-------------------|--------------------|---------------|-------------------|
|                                             | <i>Dose 1</i> | <i>Dose 2</i> | <i>Both Doses</i> | <i>Dose 1</i> | <i>Dose 2</i> | <i>Both Doses</i> | <i>Dose 1</i>      | <i>Dose 2</i> | <i>Both Doses</i> |
| Acute disseminated encephalomyelitis        | -             | -             | -                 | No            | -             | No                | No                 | -             | No                |
| Acute myocardial infarction                 | No            | No            | No                | No            | No            | No                | No                 | No            | No                |
| Appendicitis                                | No            | No            | No                | No            | No            | No                | No                 | No            | No                |
| Bell's palsy                                | No            | No            | No                | No            | No            | No                | No                 | No            | No                |
| Cerebral venous sinus thrombosis            | No            | No            | No                | No            | No            | No                | No                 | No            | No                |
| Convulsions / seizures                      | No            | No            | No                | No            | No            | No                | No                 | No            | No                |
| Disseminated intravascular coagulation      | No            | No            | No                | No            | No            | No                | No                 | No            | No                |
| Encephalitis / myelitis / encephalomyelitis | No            | No            | No                | No            | No            | No                | No                 | No            | No                |
| Guillain-Barré syndrome                     | No            | No            | No                | No            | No            | No                | No                 | No            | No                |
| Immune thrombocytopenia                     | No            | No            | No                | No            | No            | No                | No                 | No            | No                |
| Kawasaki disease                            | No            | No            | No                | -             | -             | -                 | No                 | No            | No                |
| Myocarditis / pericarditis                  | No            | No            | No                | No            | No            | No                | No                 | No            | No                |
| Pulmonary embolism                          | No            | No            | No                | No            | No            | No                | No                 | No            | No                |
| Stroke, hemorrhagic                         | No            | No            | No                | No            | No            | No                | No                 | No            | No                |
| Stroke, ischemic                            | No            | No            | No                | No            | No            | No                | No                 | No            | No                |
| Thrombotic thrombocytopenic purpura         | No            | No            | No                | No            | No            | No                | No                 | No            | No                |
| Transverse myelitis                         | No            | No            | No                | No            | No            | No                | No                 | No            | No                |
| Venous thromboembolism                      | No            | No            | No                | No            | No            | No                | No                 | No            | No                |

\* Yes = statistical signal; No = no statistical signal; - = not estimable



**eTable 4. Medical record review of 34 confirmed myocarditis/pericarditis cases 0-21 days after mRNA vaccines among individuals aged 12-39 years, December 14, 2021 - June 19, 2021.**

|                                                                | <b>Confirmed Myocarditis/Pericarditis N=34 (%)</b> |
|----------------------------------------------------------------|----------------------------------------------------|
| <b>Age, median (range)</b>                                     | 24 years (13 – 39 years)                           |
| 12-15 years                                                    | 1 (3)                                              |
| 16-19 years                                                    | 7 (21)                                             |
| 20-24 years                                                    | 10 (29)                                            |
| 25-29 years                                                    | 3 (9)                                              |
| 30-34 years                                                    | 7 (21)                                             |
| 35-39 years                                                    | 6 (18)                                             |
| Male sex                                                       | 29 (85)                                            |
| <b>Race/Ethnicity</b>                                          |                                                    |
| Hispanic/Latino                                                | 7 (21)                                             |
| White, Non-Hispanic                                            | 17 (50)                                            |
| Black, Non-Hispanic                                            | 0 (0)                                              |
| Asian, Non-Hispanic                                            | 5 (15)                                             |
| Native Hawaiian/Pacific Islander, Non-Hispanic                 | 0 (0)                                              |
| American Indian/Alaskan Native, Non-Hispanic                   | 0 (0)                                              |
| Multiple/Other                                                 | 2 (6)                                              |
| Unknown                                                        | 3 (9)                                              |
| History of COVID-19 infection                                  | 3 (9)                                              |
| History of myocarditis/pericarditis                            | 3 (9)                                              |
| Time from vaccination to symptom onset, median (range)         | 2 days (0 – 20 days)                               |
| <b>Signs and symptoms</b>                                      |                                                    |
| Chest pain/pressure/discomfort                                 | 34 (100)                                           |
| Dyspnea/Shortness of breath                                    | 15 (44)                                            |
| Palpitations                                                   | 4 (12)                                             |
| Pericardial rub                                                | 1 (3)                                              |
| Other (fever, fatigue, chills, numbness, tingling nausea, etc) | 20 (59)                                            |
| <b>Diagnostic testing</b>                                      |                                                    |
| Troponin level obtained                                        | 34 (100)                                           |
| Abnormal troponin Level                                        | 28 (82)                                            |
| ECG obtained                                                   | 34 (100)                                           |
| Abnormal ECG                                                   | 30 (88)                                            |
| Echocardiogram obtained                                        | 30/34 (88)                                         |
| Abnormal echocardiogram                                        | 15/30 (50)                                         |
| Cardiac MRI obtained                                           | 9/34 (26)                                          |
| Abnormal cardiac MRI                                           | 8/9 (89)                                           |
| <b>Diagnosis after adjudication</b>                            |                                                    |
| Acute myocarditis                                              | 7 (21)                                             |
| Acute pericarditis                                             | 6 (18)                                             |
| Myopericarditis                                                | 21 (62)                                            |
| <b>Highest level of care</b>                                   |                                                    |
| Outpatient                                                     | 1 (3)                                              |
| Emergency department                                           | 5 (14)                                             |

|                                                | <b>Confirmed<br/>Myocarditis/Pericarditis<br/>N=34 (%)</b> |
|------------------------------------------------|------------------------------------------------------------|
| Admitted to hospital                           | 26 (76)                                                    |
| Admitted to ICU                                | 2 (6)                                                      |
| Length of hospital stay, median (range)        | 1 day (0 – 13 days)                                        |
| <b>Status at time of medical record review</b> |                                                            |
| Discharged to home                             | 34 (100)                                                   |
| Follow-up visit <sup>1</sup>                   | 31 (91)                                                    |

<sup>1</sup>Nearly all follow-up notes indicated resolution of symptoms time of follow-up visit. Of those that had follow-up ECG/echo or lab testing, most had returned to normal or baseline. Most patients were noted to be tapering off some medications (nonsteroidal anti-inflammatory drug, prednisone, etc). Follow-up Notes also indicated use of colchicine maintenance and recommendations for reduced activity for 3-6 months.

**eFigure 2. Clustering of medical record confirmed myocarditis/pericarditis cases by days since most recent dose of any mRNA vaccine among individuals 12-39 years of age.**

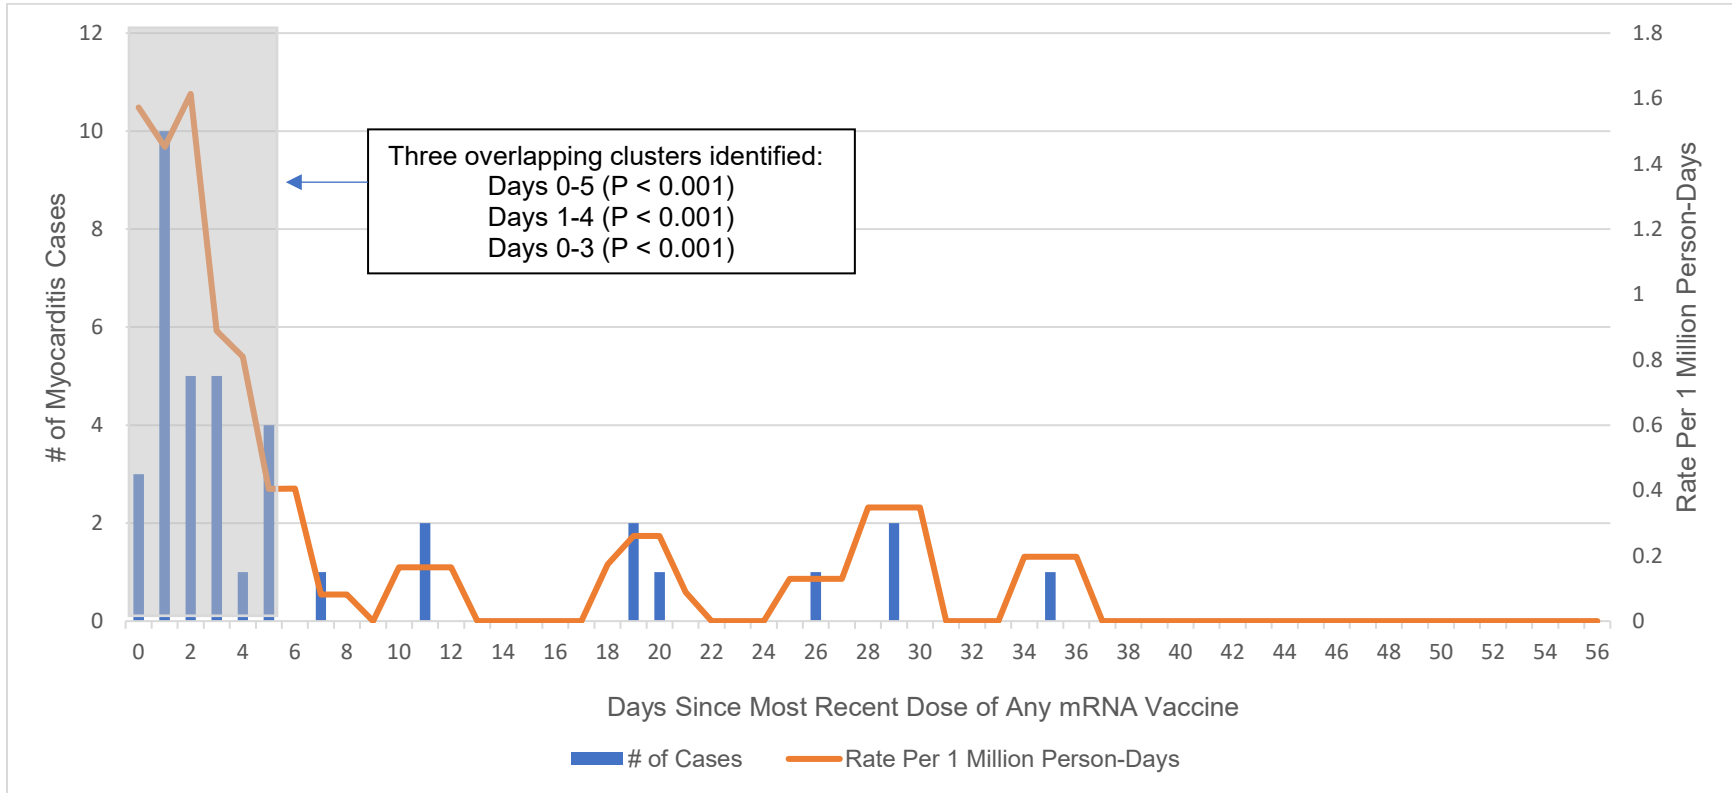

Blue bars denote number of cases of medical-record confirmed myocarditis/pericarditis during days 0-56 after either dose of an mRNA vaccine. Orange line represents the rate of confirmed myocarditis/pericarditis per 1 million person-days. The rate is a moving 3 day mean. Clusters were identified using Kulldorff's scan statistic <sup>17</sup>.

**eTable 5. Confirmed myocarditis/pericarditis following mRNA vaccines compared with vaccinated comparators among individuals aged 12 – 39 years by vaccine type and dose, December 14, 2020-June 19, 2021.**

| Vaccine Type | Risk Interval | Dose                | Events in Risk Interval | Events in Comparison Interval <sup>1</sup> | Adjusted Rate Ratio (95% Confidence Interval) <sup>2</sup> | 2-sided P-value |
|--------------|---------------|---------------------|-------------------------|--------------------------------------------|------------------------------------------------------------|-----------------|
| BNT162b2     | 0-21          | Both doses          | 14                      | 4                                          | 1.45 (0.43-5.79)                                           | 0.59            |
|              |               | Dose 1 <sup>3</sup> | 4                       | 4                                          | 2.01 (0.37-10.89)                                          | 0.41            |
|              |               | Dose 2              | 9                       | 4                                          | 1.61 (0.45-6.66)                                           | 0.49            |
|              | 0-7           | Both doses          | 10                      | 3                                          | 3.16 (0.66-19.29)                                          | 0.16            |
|              |               | Dose1 <sup>3</sup>  | 1                       | 3                                          | 2.17 (0.06-29.95)                                          | 0.60            |
|              |               | Dose 2              | 8                       | 3                                          | 4.58 (1.00-26.89)                                          | 0.05            |
| mRNA-1273    | 0-21          | Both doses          | 20                      | 0                                          | NE (3.24-NE)                                               | <0.001          |
|              |               | Dose 1              | 5                       | 0                                          | NE (0.78-NE)                                               | 0.09            |
|              |               | Dose 2              | 15                      | 0                                          | NE (3.84-NE)                                               | <0.001          |
|              | 0-7           | Both doses          | 19                      | 0                                          | NE (8.79-NE)                                               | <0.001          |
|              |               | Dose 1              | 4                       | 0                                          | NE (1.93-NE)                                               | 0.01            |
|              |               | Dose 2              | 15                      | 0                                          | NE (9.34-NE)                                               | <0.001          |

<sup>1</sup> Comparison interval for all analyses was 22-42 days after vaccination.

<sup>2</sup> Overall estimate from Poisson regression stratified by site, 5-year age group, sex, race/ethnicity, and calendar date.

<sup>3</sup> One case in both risk intervals of days 0-21 and 0-7 after Dose 2 did not contribute to these Dose 2 analyses.

**eTable 6. Unvaccinated concurrent comparator analyses, December 14, 2020-  
June 26, 2021.**

| Outcome Event                               | Informative Events <sup>3</sup> |                        | Adjusted Rate Ratio <sup>4</sup> | Weekly Analysis <sup>1,2</sup> |                 |
|---------------------------------------------|---------------------------------|------------------------|----------------------------------|--------------------------------|-----------------|
|                                             | Events in Risk Interval         | Events in Unvaccinated |                                  | 95% Confidence Interval        | 2-Sided P-Value |
| Kawasaki disease                            | 0                               | 12                     | 0.00                             | 0.00 - 2.81                    | 0.23            |
| Disseminated intravascular coagulation      | 30                              | 173                    | 0.61                             | 0.39 - 0.93                    | 0.02            |
| Thrombosis with thrombocytopenia syndrome   | 74                              | 334                    | 0.67                             | 0.50 - 0.88                    | 0.004           |
| Guillain-Barré syndrome                     | 16                              | 98                     | 0.73                             | 0.39 - 1.29                    | 0.29            |
| Stroke, hemorrhagic                         | 241                             | 947                    | 0.74                             | 0.63 - 0.86                    | <0.001          |
| Pulmonary embolism                          | 504                             | 2103                   | 0.75                             | 0.67 - 0.83                    | <0.001          |
| Thrombotic thrombocytopenic purpura         | 6                               | 43                     | 0.81                             | 0.30 - 1.95                    | 0.69            |
| Acute myocardial infarction                 | 618                             | 2216                   | 0.82                             | 0.74 - 0.91                    | <0.001          |
| Convulsion / seizures                       | 285                             | 1712                   | 0.86                             | 0.74 - 0.98                    | 0.03            |
| Stroke, ischemic                            | 1065                            | 3529                   | 0.91                             | 0.84 - 0.99                    | 0.02            |
| Immune thrombocytopenia                     | 48                              | 191                    | 0.92                             | 0.63 - 1.31                    | 0.64            |
| Appendicitis                                | 779                             | 4289                   | 1.06                             | 0.97 - 1.15                    | 0.21            |
| Bell's palsy                                | 543                             | 2379                   | 1.06                             | 0.95 - 1.17                    | 0.31            |
| Venous thromboembolism                      | 629                             | 2191                   | 1.08                             | 0.97 - 1.19                    | 0.15            |
| Cerebral venous sinus thrombosis            | 18                              | 53                     | 1.10                             | 0.58 - 2.03                    | 0.75            |
| Encephalitis / myelitis / encephalomyelitis | 17                              | 59                     | 1.11                             | 0.57 - 2.11                    | 0.75            |
| Myocarditis / pericarditis                  | 87                              | 293                    | 1.39                             | 1.05 - 1.82                    | 0.02            |
| Transverse myelitis                         | 10                              | 23                     | 1.79                             | 0.75 - 4.12                    | 0.19            |
| Acute disseminated encephalomyelitis        | 5                               | 7                      | 2.65                             | 0.61 - 10.92                   | 0.19            |

<sup>1</sup>Weekly analyses include all data to date, but confidence intervals and P-values do not account for the multiple chances for a false positive signal during surveillance.

<sup>2</sup>Per protocol, sequential analyses for a signal are only conducted with vaccinated comparators and no sequential testing is conducted using unvaccinated comparator analyses. Rather, these analyses are done routinely to supplement our sequential analyses. These analyses are particularly useful early in surveillance before sufficient vaccinated concurrent comparators is available.

<sup>3</sup>Events in each stratum were only informative on a day when there was at least one person in the risk interval, at least one unvaccinated person, and at least one outcome among either the vaccinated or unvaccinated. Therefore, the number of risk interval events in this table may not be the same as the number of risk interval events in vaccinated concurrent comparator analyses (Table 3).

<sup>4</sup>Overall estimate from Poisson regression stratified by site, 5-year age group, sex, race/ethnicity, and calendar date.
